1 **The effect of terminal globular domains on the response of**  
2 **recombinant mini-spidroins to fiber spinning triggers**

3 William Finnigan<sup>1</sup>, Aled D. Roberts<sup>1</sup>, Nigel S. Scrutton<sup>1</sup>, Rainer Breitling<sup>1</sup>, Jonny  
4 J. Blaker<sup>2</sup> and Eriko Takano<sup>1\*</sup>

5 <sup>1</sup> Manchester Institute of Biotechnology, Manchester Synthetic Biology Research Centre  
6 SYBIOCHEM, Department of Chemistry, The University of Manchester, Manchester, M1  
7 7DN, UK

8 <sup>2</sup> Bio-Active Materials Group, Department of Materials, The University of Manchester,  
9 Manchester, M13 9PL, UK

10 **Abstract**

11 Spider silk spidroins consist of long repetitive protein strands, flanked by globular terminal  
12 domains. The globular domains are often omitted in recombinant spidroins, but are thought  
13 to be essential for the spiders' natural spinning process. Mimicking this spinning process  
14 could be an essential step towards producing strong synthetic spider silk. Here we describe  
15 the production of a range of mini-spidroins with both terminal domains, and characterize  
16 their response to a number of biomimetic spinning triggers. Our results suggest that the  
17 inclusion of the terminal domains is needed to match the response to shear that native  
18 spidroins exhibit. Our results also suggest that a pH drop alone is insufficient to trigger  
19 assembly in a wet-spinning process, and must be combined with salting-out for effective  
20 fiber formation. With these insights, we applied these assembly triggers for relatively  
21 biomimetic wet spinning. This work adds to the foundation of literature for developing

22 improved biomimetic spinning techniques, which ought to result in synthetic silk that more  
23 closely approximates the unique properties of native spider silk.

24 **Keywords:** Spider silk, biomimetic spinning, fibers, synthetic biology, spidroin, protein

## 25 **1. Introduction**

26 Spider dragline silk has impressive mechanical properties, with high strength and good  
27 extensibility resulting in a level of toughness, which exceeds all other natural and synthetic  
28 fibers <sup>1</sup>. However, unlike silk worms, spiders cannot be efficiently farmed for their silk <sup>2</sup>. For  
29 this reason, the production of recombinant spider silk proteins (spidroins), and their  
30 subsequent spinning into synthetic spider silk fibers, has been an active topic of research for  
31 a number of decades <sup>3</sup>.

32 Major ampullate spider silk proteins (spidroins) are typically 200–350 kDa in size and  
33 constitute the dragline silk of spiders. Generally, spidroins have three distinct regions  
34 (**Figure 1**) <sup>3</sup>. The vast majority of the protein is repetitive, consisting of alternating  
35 polyalanine regions and glycine-rich regions <sup>4</sup>. At the terminals of the spidroin exist non-  
36 repetitive domains, referred to as the N- and C-terminal domains (NTD and CTD). These  
37 globular terminal domains are crucial in facilitating the soluble storage of the spidroins at  
38 high concentrations (30–50 % w/v) in the silk gland, and in initiating fiber assembly <sup>5</sup>.

39 Much of the research into recombinant spider silk has focused on spidroins consisting of  
40 only the repetitive region. Whilst some of the largest recombinant spidroins have resulted in  
41 fibers with good mechanical properties, larger repetitive regions typically result in poor  
42 spidroin yields <sup>6,7</sup>. Commonly, denaturing conditions have been employed in either the  
43 purification or spinning processes. Silk proteins purified under these conditions have been

44 shown to lack the response to shear native spinning dopes exhibit, essential in the use of  
45 shear to provide alignment in the fiber, and as an assembly trigger itself <sup>8</sup>. In contrast,  
46 biomimetic spinning utilising correctly folded terminal domains may offer the production of  
47 more biomimetic spinning dopes, and a route to synthetic spider silk fibers with superior  
48 mechanical properties <sup>3,5</sup>.

49 In spiders, dragline spidroins are stored in an ampulla (or sac) in the silk gland, where the  
50 highly concentrated spinning dope forms a lyotropic liquid crystalline solution <sup>9,10</sup>. Upon  
51 spinning, the spidroins proceed through a long and increasingly narrow S-shaped spinning  
52 duct where the coordinated action of acidification, ion exchange, dehydration, shearing  
53 force and elongational flow, is proposed to trigger assembly and promote alignment of  $\beta$ -  
54 sheet nanocrystals as the fibers are formed (**Figure 1**) <sup>10,11</sup>. Chaotropic sodium and chloride  
55 ions are replaced with potassium and kosmotropic phosphate ions during the spinning  
56 process, inducing salting out of the spidroins <sup>12-14</sup>. Chaotropic ions have been shown to  
57 prevent intra- and intermolecular interactions on the recombinant repetitive regions, while  
58 kosmotropic ions promote hydrogen bond interactions in the glycine-rich regions <sup>15</sup>. The pH  
59 drops from pH 7.6 at the beginning of the duct, to pH 5.7 by halfway through, and likely  
60 lower near the spinneret, as a result of the action of a carbonic anhydrase <sup>16,17</sup>. The  
61 decreasing pH causes conformational changes in the N- and C-terminal domains, which act  
62 as regulatory elements for the control of spidroin assembly <sup>3</sup>. In contrast, the molecular  
63 structure of some recombinant repetitive regions have been shown not to respond to pH <sup>18</sup>.  
64 The NTD is known as the 'lock', as this domain dimerises in response to the decreasing pH <sup>19</sup>.  
65 This dimerization 'locks' the spidroins into an infinite network, as the CTDs form a  
66 disulphide-linked dimer <sup>20-22</sup>. The CTD is proposed to partially unfold in response to

67 decreasing pH. This change is thought to cause the CTD to form  $\beta$ -sheet amyloid fibrils,  
68 nucleating the formation of  $\beta$ -sheet fibrils in the repetitive region, in a process analogous to  
69 the nucleation of various kinds of amyloid fibers<sup>20,21</sup>.

70 Recent work showed a small mini-spidroin featuring both terminal domains could be spun  
71 into a fiber by wet-spinning using a coagulation bath at pH 5.0, rather than the more  
72 commonly used denaturing methanol or isopropanol<sup>5</sup>. Here we build upon this to further  
73 investigate the expression of a range of mini-spidroins featuring pH-responsive terminal  
74 domains, which we have termed “complete” mini-spidroins to differentiate them from mini-  
75 spidroins consisting of only a repetitive region. We demonstrate the effects of pH, ion  
76 exchange and shearing force, which spiders employ during spinning, on one of these  
77 complete mini-spidroins and identify potentially relevant triggers for the development of  
78 better biomimetic spinning techniques. Finally, we use the resulting understanding of these  
79 assembly triggers to biomimetically spin synthetic spider silk fibers.

80

## 81 **2. Methods**

### 82 **2.1 Spidroin cloning, protein expression and purification.**

83 Genes for the N- and C-terminal domains (NTD1, NTD2, CTD1 and CTD2) were synthesised  
84 and cloned into the *NcoI* and *HindIII* restriction sites of the plasmid pNIC28-BSA4<sup>23</sup>. The  
85 plasmid designated pTE1253 (NTD2-*BsaI*-CTD1-pNIC28) was generated by Gibson assembly  
86<sup>24</sup>. *R*<sub>18</sub> was gene synthesised with the inclusion of *BsaI* and *Bpil* restriction sites. Repetitive  
87 regions below *R*<sub>18</sub> in size were generated by PCR with the inclusion of *BsaI* and *Bpil*  
88 restriction sites, and cloned directly into pTE1253 (Supplementary Material **Figure S4**).

89 Repetitive regions larger than  $R_{18}$  were generated according the scheme outlined in  
90 Supplementary Material **Figure S3**, before sub cloning into pTE1253. All constructs featured  
91 an N-terminal 6x His tag. Plasmid sequences are available as supplementary material  
92 (**Supplementary Material 3 zip**). Protein sequences are available at the end of the  
93 Supplementary Material as Supplementary Table 2. Cloning was carried out in *E. coli* 5 $\alpha$ .  
94 Protein expression was carried out in *E. coli* BL21(DE3) in Terrific Broth media with the  
95 addition of 100  $\mu\text{g}/\mu\text{l}$  kanamycin. Cells were grown to approximately 0.8  $\text{OD}_{600\text{nm}}$  (optical  
96 density at 600 nm) at 37 °C with shaking at 180 rpm, at which point IPTG was added to a  
97 concentration of 200  $\mu\text{M}$ . Temperature was dropped to 20 °C for protein expression  
98 overnight. Cell lysate was prepared by sonication on ice followed by centrifugation to  
99 remove the insoluble fraction. Proteins were purified from cell lysate by immobilized metal  
100 affinity chromatography using a Ni-NTA resin, eluted using 250 mM imidazole. Purified  
101 protein was dialyzed twice against 25 mM TrisHCl pH 8.0, at 4 °C. Aggregated protein  
102 following dialysis was removed by centrifugation. Protein expression and purification was  
103 analyzed by SDS-PAGE. Protein concentrations were determined in triplicate by  $\text{OD}_{280\text{nm}}$   
104 using a Nanodrop 2000 (Thermo Scientific), using an extinction coefficient and molecular  
105 weight for each protein calculated using the ExPaSy ProtParam tool <sup>25</sup>. Where necessary  
106 dilutions of proteins were made before determining the concentrations. Single use aliquots  
107 of protein were stored at  $-80$  °C where appropriate.

## 108 **2.2 Size exclusion chromatography of NTD2**

109 Buffers consisting of 25 mM Tris pH 8.0 with either 0 or 300 mM NaCl, and 25 mM MES pH  
110 5.5 with either 0 or 300 mM NaCl, were prepared and filtered. 250  $\mu\text{l}$  of purified NTD2 at 3.4  
111 mg/mL was loaded onto a Superdex 200 Increase 10/300 GL size exclusion column pre-

112 equilibrated in the relevant buffer, using an AKTA Pure system. The sample was eluted over  
113 1.2 column volumes, with samples coming off the column monitored at OD<sub>280nm</sub>. Retention  
114 times were compared to a standard curve of known proteins, and the theoretical molecular  
115 weight of NTD2 to estimate oligomeric state.

116

### 117 **2.3 Tryptophan fluorescence**

118 Tryptophan fluorescence for NTD2 at 0.8 mg/mL was recorded between 310 and 400 nm  
119 (bandwidth 10 nm) while exciting at 280 nm (bandwidth 20 nm). The assay was performed  
120 in triplicate in a 96-well microtiter plate using a M200 Infinite plate reader (Tecan). pH  
121 values between 8.2 and 5.5 were achieved using assay concentrations of 50 mM HEPES,  
122 Tris-HCl, MES or sodium acetate, depending on the desired pH. Blank measurements were  
123 recorded in every condition and subtracted from the final reading.

### 124 **2.4 Dynamic scanning fluorimetry**

125 Dynamic scanning fluorimetry assays were carried out using 96-well PCR plates (BioRad) in a  
126 CFX Connect Real-Time PCR detection system (BioRad), using the HEX filter<sup>26-28</sup>. Assay  
127 volume was set at 30  $\mu$ L. Suitable protein concentrations between 1 – 10  $\mu$ M for each assay  
128 were determined by titrating the amount of protein. A master mix of protein and sypro  
129 orange was prepared, and 5  $\mu$ L added to every well. Sypro orange was used at an assay  
130 concentration of 5x. 25  $\mu$ L of each assay buffer solutions were transferred by multi-channel  
131 pipette to the assay plate in triplicate. The assay plate was sealed and briefly centrifuged  
132 before starting the assay. After a 3 minute hold at 25 °C, temperature was increased by

133 0.4 °C every 30 seconds up to 95 °C. Peaks in  $dF/dt$ , corresponding to the  $T_M$  of the protein,  
134 were identified using the Biorad CFX Manager software.

135 To investigate the response of CTD1 to pH, a range of pH values between 8.2 and 5.5 were  
136 set up in a 96 deep-well block to achieve assay concentrations of 50 mM HEPES, Tris-HCl,  
137 MES or sodium acetate. No salt, or assay concentrations of 250 mM NaCl or 250 mM KCl  
138 were added to three separate sets of buffers. Subsequent assays used assay concentrations  
139 of 40 mM HEPES (pH 8.0 and 7.0), 40 mM MES (pH 6.0), and 40 mM sodium acetate (pH  
140 5.0). NaCl or KPi concentrations were added at each pH for assay concentrations between 0  
141 and 400 mM. Potassium phosphate was prepared at each pH from solutions of  $KH_2PO_4$  and  
142  $K_2HPO_4$ , referred to as KPi here.

### 143 **2.5 Rheology flow sweeps**

144 Rheology was conducted using 180  $\mu$ L sample of 200 mg/mL the mini-spidroin designated  
145 N-R<sub>7</sub>-C for shear sweep measurements, or 100 mg/mL N-R<sub>7</sub>-C for the frequency, amplitude  
146 and time sweeps. The lower concentration of 100 mg/mL was used initially to facilitate  
147 more preliminary experiments. A discovery HR-2 hybrid rheometer (TA Instruments) was  
148 used, with a parallel plate geometry with a plate diameter of 20 mm. A geometry gap of 500  
149  $\mu$ m was used and a solvent trap attached to prevent evaporation. Experiments were carried  
150 out at 25 °C. The viscosities of the solutions under shear sweeps were investigated using a  
151 logarithmic steady shear rate increase from 0.01 to 1000  $s^{-1}$ . Samples were run four times  
152 each, with and without a 15 min settle time to check for the effect of immediate  
153 consecutive runs.

154 **2.6 Turbidity assays to investigate aggregation.**

155 An array of buffer conditions were prepared in a 96-well microtitre plate. Assay  
156 concentrations of 50 mM HEPES (pH 8.0 and 7.0), 50 mM MES (pH 6.0), or 50 mM sodium  
157 acetate (pH 5.0) were prepared, each with 0 to 250 mM assay concentrations of NaCl or KPi,  
158 in triplicate. KPi stock solutions were prepared at each pH from  $\text{KH}_2\text{PO}_4$  and  $\text{K}_2\text{HPO}_4$ . Assays  
159 were initiated by the addition of 25  $\mu\text{L}$  protein for an assay concentration of approximately  
160 40  $\mu\text{M}$ , gently mixed by tapping the plate before placing into the Clariostar plate reader  
161 (BMG Labtech). To measure changes in turbidity, the average of four  $\text{OD}_{340}$  readings was  
162 recorded every minute per well for one hour. Protein concentrations before and after the  
163 assay were determined by taking 2  $\mu\text{L}$  of protein from the top of each well and measuring  
164  $\text{OD}_{280}$  using a nanodrop.

165 **2.7 Analysis of mini-spidroin assembly**

166 To investigate the effect of potassium phosphate during a wet spinning process, buffers  
167 containing 50 mM HEPES pH 8.0, or 50 mM sodium acetate pH 5.0 were prepared with the  
168 addition of 0 to 500 mM potassium phosphate, prepared from  $\text{KH}_2\text{PO}_4$  and  $\text{K}_2\text{HPO}_4$  at the  
169 relevant pH. N-R<sub>7</sub>-C at 100 mg/mL was extruded at 0.5 mL/hr using a syringe pump (Cole-  
170 Palmer 74900 series) with a 1 mL syringe, through a blunted 16G needle.

171 **2.8 Fiber spinning and analysis**

172 N-R<sub>7</sub>-C at 300 mg/mL was extruded using a syringe pump through a pre-pulled glass capillary  
173 (MGM-3-1.5-5NF, 30  $\mu\text{m}$  tip, FivePhoton Biochemicals) at 0.5 mL/h using a syringe pump  
174 (Cole-Palmer 74900 series) with a 1 mL syringe into a coagulation bath of 500 mM sodium  
175 acetate pH 5.0, 200 mM NaCl. A fiber was pulled using tweezers onto a custom made



176 rotating collector onto which fibers were collected continuously at approximately 9.6  
177 m/min.

178 Individual fibers were mounted onto cardboard mechanical testing windows with a 5 mm  
179 gauge length using scotch tape. Each fiber on a window was imaged by light microscopy  
180 (Leica DMI6000) at 20x magnification. Fiber diameters were measured using ImageJ at  
181 multiple points along the fiber, and the average taken. The cross sectional area of each fiber  
182 was calculated from the average diameter, for subsequent mechanical testing  
183 measurements. Fibers on cardboard frames were mounted into a tensile testing machine  
184 (Instron 3344; Instron Ltd.), equipped with a 10 N load cell. Upon mounting, the sides of the  
185 window were cut and the fiber loaded. Tensile tests were performed at a rate of 0.5  
186 mm/min at room temperature and humidity (28 °C, 52 % humidity). Engineering stress was  
187 calculated from the measured load using the calculated cross-sectional area. The ultimate  
188 tensile stress (UTS) and strain to failure were determined, Young's modulus was calculated  
189 from initial linear portion of the stress-strain curve, and toughness calculated from the area  
190 under the stress-strain curve.

191 Fiber diameters and morphologies were assessed using scanning electron microscopy (SEM)  
192 for spidroins spun into a coagulation bath consisting of 500 mM sodium acetate pH 5.0, 200  
193 mM NaCl. A number of these fibers were mounted onto aluminium SEM studs with double-  
194 sided conductive carbon tape and sputter-coated with gold/palladium (Gatan Model 682  
195 Precision Etching Coating System, USA). Fibers were imaged using scanning electron  
196 microscopy (SEM) on a Hitachi S300 N SEM and an FEI Quanta 250 FEG-SEM. Samples were  
197 initially sputter coated (10 nm thickness) with an Au/Pd alloy to enhance conductivity.

198 Fiber crystallinity was determined by wide-angle X-ray diffraction (WAXD) using a  
199 PANalytical X'Pert Pro (UK) instrument with  $K\alpha$  radiation source ( $K\alpha_{av} = 1.542 \text{ \AA}$ ). The fiber  
200 bundle was mechanically attached to a zero-background holder and the diffraction angle  
201 ranged between  $5 - 60^\circ$  with a scanning rate of  $1^\circ \text{ min}^{-1}$ .

202

### 203 **3. Results and Discussion**

#### 204 **3.1 Functional terminal domains are necessary to produce complete mini-spidroins for** 205 **biomimetic spinning**

206 We first sought to identify and characterize highly expressed, soluble and pH-responsive N-  
207 and C-terminal domains, which we selected from major ampullate spidroins 1 and 2 of  
208 *Latrodectus hesperus* (Supplementary Material **Figure S1**, NTD1, NTD2, CTD1 and CTD2 for  
209 major ampullate spidroins 1 and 2 respectively. NTD2 and CTD1 were used for this study). A  
210 tryptophan residue, which is buried in the monomer of NTDs, has previously been shown to  
211 become exposed in the dimer conformation allowing the conformational change leading to  
212 dimerization to be followed by tryptophan fluorescence<sup>29</sup>. NTD2 showed a large shift in  
213 fluorescence with decreasing pH suggesting such a conformational change (**Figure 2B**). Size  
214 exclusion chromatography (SEC) showed NTD2 to form a dimer at pH 5.0, while remaining a  
215 monomer at pH 8.0, in the presence of 300 mM NaCl (**Figure 2A**). However, we noted that  
216 NTD2 eluted slightly later than expected, likely due to the addition of an unstructured  
217 section of repetitive region in the protein used in this experiment (Supplementary Material  
218 **Figure S1A**), other experiments were carried out NTD2 without this domain. In the absence  
219 of NaCl, NTD2 eluted earlier from the SEC column. In addition, following the SEC in these  
220 conditions the samples appeared visibly cloudy.

221 CTD1 was confirmed to form a disulphide-linked dimer by non-reducing SDS-PAGE (**Figure**  
222 **2C**). A spidroin featuring both NTD2 and CTD1 is therefore expected to polymerise via end-  
223 to-end linking of the terminal domains, upon dimerization of NTD2. CTD1 was shown to  
224 become less thermostable with decreasing pH by dynamic scanning fluorimetry (**Figure 2D**)  
225 <sup>26-28</sup>. Higher initial fluorescence was also observed in this assay with decreasing pH  
226 (Supplementary Material **Figure S2**), indicating more exposed hydrophobic regions at lower  
227 pH values. These results correspond with CTD1 partially unfolding with decreasing pH,  
228 suggesting a sequence prone to hydrophobic  $\beta$ -aggregation present in CTD1 and other C-  
229 terminal domains <sup>20,21</sup>, consistent with the amyloid nucleation concept described above.

230 Having characterized suitable terminal domains, these were incorporated into a mini-  
231 spidroin expression vector - pTE1253, into which different repetitive regions could be easily  
232 cloned for the production of complete mini-spidroins. We adopted a cloning scheme  
233 utilising Type IIS restriction sites, allowing both pseudo-scarless duplication of repetitive  
234 regions, and their transfer into pTE1253 (Supplementary Material **Figure S3** and **S4**).

235

### 236 **3.2 Smaller complete mini-spidroins offer substantially higher protein yields**

237 A range of different sized repetitive regions were generated from a codon-optimised DNA  
238 sequence for a section of the repetitive region of the major ampullate spidroin 1 from  
239 *Latrodectus hesperus*. Repetitive regions were cloned into pTE1253 to generate a range of  
240 “complete” mini-spidroins with both terminal domains (NTD2 and CTD1) (**Figure 3A, 3B**). In  
241 addition, we generated a construct featuring both terminal domains but no repetitive  
242 region, designated NC throughout. Expression of these constructs in *E. coli* BL21(DE3)  
243 resulted in good levels of expression for constructs up to N-R<sub>18</sub>-C, at four hours post

244 induction (**Figure 3C**) compared to 20h of incubation (**Figure 3D**). Expression of constructs  
245 larger than this (N-R<sub>36</sub>-C to N-R<sub>291</sub>-C) were not detected by SDS-PAGE (Supplementary  
246 Material **Figure S5**).

247 Smaller mini-spidroins allowed substantially higher levels of expressed soluble protein when  
248 cultures were grown overnight. In comparison, the expression level for the larger mini-  
249 spidroins decreased with longer growth times, likely due to intracellular aggregation  
250 (Supplementary Material **Figure S5**). Indeed, mini-spidroins with larger repetitive regions  
251 are proposed to be more aggregation-prone<sup>20</sup>. Efforts to express the repetitive regions  
252 alone yielded no visible expression by SDS-PAGE analysis of *E. coli* lysates (data not shown).

253 Higher yields were obtained for the smaller mini-spidroins (~30 mg/L purified protein for N-  
254 R<sub>18</sub>-C, ~420 mg/L purified protein for N-R<sub>7</sub>-C), and all could be purified to high purity using  
255 nickel immobilized metal affinity chromatography (Supplementary Material **Figure S6**).  
256 Following dialysis, small mini-spidrions N-R<sub>7</sub>-C and N-R<sub>10</sub>-C could be concentrated to at least  
257 30 % w/v as is seen in spiders<sup>30</sup>, without premature aggregation using centrifugal  
258 concentrators. During this process a significantly more viscous phase was observed to form  
259 at the bottom of the concentrator. In contrast, processing of the larger mini-spidroin N-R<sub>18</sub>-  
260 C was not possible in this way due to aggregation. We also attempted to concentrate N-R<sub>18</sub>-  
261 C by reverse osmosis without success.

262

263 **3.3 A complete mini-spidroin featuring both terminal domains displays shear thinning,**  
264 **similar to native spider silk spinning dopes.**

265 The rheological properties of N-R<sub>7</sub>-C at 200 mg/mL (20 % w/v) at pH 8.0 were investigated  
266 (**Figure 4**, Supplementary Material **Figure S7**). The spinning dope behaved as a non-

267 Newtonian fluid, displaying shear thinning. This response to shear is shared with native  
268 spider silk and silk worm spinning dopes<sup>31</sup>, but not with recombinant spidroins consisting of  
269 only a repetitive region<sup>32</sup>, or with reconstituted silk fibroin (RSF) in which the terminal  
270 domains are unlikely to be correctly folded<sup>8,33</sup>. This suggests that the inclusion of terminal  
271 domains is an important factor for a response to shear similar to native spider silk spinning  
272 dopes. Likely denaturing these terminal domains, as occurs in the production of RSF, might  
273 limit this response<sup>31,33</sup>.

274 At high shear rates the viscosity of our mini-spidroin plateaued, and the solution behaved as  
275 a Newtonian fluid, suggesting complete alignment of the spidroins (**Figure 4**). Low  
276 concentration native spider silk dopes show this effect, but at higher concentrations shear  
277 thickening events, which indicate shear-induced aggregation, are observed<sup>34</sup>. Our mini-  
278 spidroin showed no shear-thickening events, and multiple repeated runs did not result in a  
279 difference in rheological behaviour (**Figure 4**). Taken together, these results suggest shear as  
280 an important process in providing alignment during the biomimetic spinning of complete  
281 mini-spidroins, as is thought to occur in spider silk gland ducts<sup>10</sup>. However, unlike native  
282 spider silk spinning, shear does not act as an assembly trigger itself for our small mini-  
283 spidroin. This property likely facilitates their high expression levels (**Figure 3C**), and their  
284 processing to a suitably high concentration as soluble protein.

285

### 286 **3.4 NTD2 requires stabilisation by electrolytes at pH 5.0 to prevent undesirable** 287 **aggregation of mini-spidroins**

288 The effect of varying concentrations of NaCl and potassium phosphate on N-R<sub>7</sub>-C and the  
289 terminal domains, across different pH values, was assayed by measuring turbidity and

290 soluble protein concentration over time (**Figure 5**). Potassium phosphate was prepared at  
291 each pH from solutions of  $\text{KH}_2\text{PO}_4$  and  $\text{K}_2\text{HPO}_4$ , referred to as KPi here. Potassium phosphate  
292 was chosen to investigate the effect of these ions, which are proposed to increase during  
293 the spinning process<sup>12-14</sup>. Where aggregation occurred, an initial fast increase in turbidity  
294 was observed, followed by decreasing turbidity due to a loss of light scattering as larger  
295 aggregates formed, as reported with natural spider silk dopes<sup>34</sup>. In these cases, a large  
296 decrease in the soluble protein was observed at the end of the assay (**Figure 5**, symbols).

297 NTD2 aggregated in the absence of NaCl or KPi at pH 5.0 (**Figure 5A**). Dimerization of  
298 spidroin N-terminal domains is induced via a protonation-induced dipole interaction<sup>35</sup>. In  
299 the absence of salt, our results suggest that the formation of this dipole at pH 5.0 results in  
300 the undesirable aggregation of NTD2 domains, rather than simply dimerization. Stabilization  
301 of the NTD dipole at pH 5.0, through the addition of NaCl or KPi, appears to prevent this  
302 aggregation (**Figure 5**). Indeed, electrolytes have been proposed to be important in  
303 stabilising local clusters of negative and positive charge on the NTD surface<sup>35</sup>, with the  
304 addition of NaCl shifting the pKa for dimerization towards a more acidic pH<sup>36</sup>.

305 Such aggregation of NTD2 likely also occurs in the context of a complete mini-spidroin.  
306 Indeed, the rate of assembly of N-R<sub>7</sub>-C into larger aggregates, indicated by decreasing  
307 turbidity, was substantially slower in the absence of NaCl or KPi (**Figure 5C**). A similar  
308 response was observed for a construct featuring both terminal domains, but no repetitive  
309 region (NC, **Figure 5D**). In contrast, CTD1 alone did not behave in this way (**Figure 5B**),  
310 suggesting this response is due to the effects of NTD2, which aggregated in this condition  
311 (**Figure 5A**).

312 N-R<sub>7</sub>-C also displays a large negative shift in thermal stability in the absence of salt at pH 5.0  
313 (**Figure 6**), which is likely caused by the un-stabilised dipole at the N-terminal domain at this  
314 pH. Similar DSF experiments of NC, NTD2 and CTD1 appear to support this assessment  
315 (Supplementary Material **Figure S8**). Interestingly, we also observed a decrease in the TM of  
316 N-R<sub>7</sub>-C with increasing KPi, and to a much lesser extent higher concentrations of NaCl, at pH  
317 8.0 and 7.0, suggesting the mini-spidroin is becoming destabilised by the addition of these  
318 salts at neutral pH (**Figure 6**). This effect is not observed at lower pH values which may be  
319 due to a stronger response to pH overall.

320 Our results suggest the slow rate of assembly of N-R<sub>7</sub>-C into larger aggregates at pH 5.0 in  
321 the absence of NaCl or KPi is due to incorrect aggregation of the NTD2 domain, as observed  
322 with this domain alone, which likely inhibits the correct assembly of the mini-spidroin.  
323 Indeed, it has been indicated that the presence of NaCl in the spiders silk gland is important  
324 in preventing undesired aggregation<sup>37</sup>.

325 A previous study has shown another NTD to behave in a similar way, with turbidity  
326 measurements of NTD much higher at pH 6 in the absence of salt, than either pH 7 or 6 in  
327 the presence of salt<sup>38</sup>. The inclusion of this NTD in a mini-spidroin resulted in macroscopic  
328 structures forming earlier in a self-assembly assay in the absence of salt, but no faster in the  
329 presence of salt. In light of our results, possibly the earlier formation of macroscopic  
330 structures in the absence of salt could be due to fast, non-specific aggregation at the NTD,  
331 which is undesirable in a spinning process.

332

333 **3.5 Both a pH drop and salting out are required for effective biomimetic wet spinning**

334 Exchange of sodium and chloride ions for potassium and phosphate ions in the natural  
335 spinning process is proposed to induce salting out of the spidroins<sup>12-14</sup>. To further examine  
336 the effect of increasing potassium phosphate concentration during biomimetic wet  
337 spinning, N-R7-C at 100 mg/mL was extruded via a needle into a range of buffer conditions  
338 at both pH 5.0 and pH 8.0, and the resulting fibers observed (**Figure 7**). Again, potassium  
339 phosphate was prepared at the relevant pH by mixing solutions of  $\text{KH}_2\text{PO}_4$  and  $\text{K}_2\text{HPO}_4$ .

340 At pH 8.0, high (>300 mM) potassium phosphate concentrations resulted in visible  
341 aggregates that appeared to extrude from the needle as a fiber, likely due to salting-out of  
342 the mini-spidroin. The salting-out of N-R7-C appears similar to as observed for CTD1 alone at  
343 pH 8.0 and high potassium phosphate in the turbidity assays (**Figure 5**). However, in the  
344 absence of polymerisation of the mini-spidroin via NTD2, robust fibers were not formed  
345 resulting in only loosely associated aggregates. Collection of fibers at pH 8.0 at any KPi  
346 concentration was not possible, as they completely disintegrated upon contact in solution.

347 In contrast, at pH 5.0 with the addition of increasing concentrations of potassium  
348 phosphate, progressively more robust fibers formed. This resulted in an aggregated mass  
349 forming, rather than fibers, at higher potassium phosphate concentrations (>300 mM). In  
350 the absence of potassium phosphate (0 mM), a colloidal suspension was observed, likely a  
351 result of aggregation via NTD2 in this condition. Fibers could be collected or pulled and  
352 stretched from aggregates at the needle tip using tweezers (pH 5.0, >300 mM KPi only).

353 Based on these observations, we conclude that both a drop to pH 5.0 in combination with  
354 salting-out is necessary for the formation of robust fibers which can be collected, and either  
355 of these triggers alone is insufficient. Importantly, these conditions allow an artificial dope



356 with suitable rheological properties to be formed, which can then be mechanically drawn  
357 into a fiber.

358 We also note that a requirement for salting out has been shown not to be necessary for the  
359 self-assembly of some native and recombinant spidroins<sup>37-39</sup>. Importantly, self-assembly is  
360 able to occur on a time-scale of hours, while fiber formation in a spinning process must  
361 occur over seconds, resulting in different requirements.

362

363

### 364 **3.6 Biomimetic wet spinning of a complete mini-spidroin results in synthetic spider silk** 365 **fibers**

366 The production of fibers from N-R7-C by the extrusion into a biomimetic coagulation bath  
367 was tested. A coagulation bath consisting of 50 mM sodium acetate, 500 mM potassium  
368 phosphate pH 5.0 was used, inducing a pH drop in combination with salting-out. An  
369 aggregated mass formed at the tip of needle from which a fiber could be pulled by tweezers  
370 and collected continuously onto a rotating collector (**Supplementary Material 2-movie**).

371 This is analogous to how spiders spin silk, with the silk pulled from the spinneret rather than  
372 pushed, in a process referred to as pultrusion<sup>40</sup>. This use of mechanical force is also  
373 important in achieving strong, aligned fibers, evidenced by the need for post-spin drawing in  
374 many examples of synthetic spider silk spinning<sup>41</sup>. The diameters of the fibers, as  
375 determined by light microscopy, varied between 14 and 51  $\mu\text{m}$ . Engineering stress and  
376 strain of as-spun fibers were determined by tensile testing, with a mean ultimate tensile  
377 strength of 40.3 MPa, and a maximum of 78 MPa (**Figure 8**). The fibers showed a lower  
378 Young's modulus than native spider silk ( $11.6 \pm 0.7 \text{ GPa}$ <sup>42</sup>). Thinner fibers correlated with

379 higher ultimate tensile strength (UTS), and higher values for Young's modulus ( $R = -0.62$  and  
380  $R = -0.53$  respectively, Supplementary Material **Figure S9 and S10**). A comparison with the  
381 mechanical properties obtained in other studies is shown in Supplementary Material **Table**  
382 **S1**. Scanning electron microscopy (SEM) of some fibers evidenced many aligned fibrils  
383 (**Figure 9A, 9B**). However, a second batch of fibers spun separately and imaged at higher  
384 resolution did not show this (**Figure 9C**). The presence of many aligned fibrils constituting  
385 the fiber would be promising as natural spider silk is thought to consist of a hierarchical  
386 structure with many silk fibrils, covered by a skin layer, making up a silk fiber<sup>43</sup>.

387 Wide-angle X-ray diffraction (WAXD) was conducted on a bundle of fibers to probe their  
388 crystallinity (Supplementary Material **Figure S11**). A broad amorphous region was observed  
389 along with two distinguishable diffraction peaks at approximately 10.4 and 22.6 degrees,  
390 indexed respectively as the (100) and (120) Bragg reflections of  $\beta$ -sheet crystallites as  
391 reported by Du et al<sup>44</sup>. The average  $\beta$ -sheet crystallite size was calculated as 4.8 nm x 2.0  
392 nm by application of the Scherrer equation on the deconvoluted peaks;

$$L = \frac{K\lambda}{\beta \cos\theta}$$

393

394 where  $L$  is the mean size of the crystallite domains,  $\lambda$  is the X-ray wavelength (1.542 Å),  $K$  is  
395 the dimensionless shape factor (taken as 0.9),  $\beta$  is the peak full width at half maximum  
396 (FWHM) and  $\theta$  is the diffraction angle. The data were broadly in agreement with WAXD  
397 patterns of natural spider silk reported by Du et al<sup>44</sup>.

398

399 Our results are in good agreement with previous work, which demonstrated the wet-  
400 spinning of a mini-spidroin with both terminal domains via a pH drop. We selected a pH  
401 drop to 5.0 for comparison with this work, and have more thoroughly investigated the  
402 effects of ionic strength on this spinning process, demonstrating this to be an important  
403 factor in this approach <sup>5</sup>. The development of a spinning process utilising multiple smaller  
404 pH drops, or a continuous gradient could offer further improvements <sup>3</sup>. In the development  
405 of such an approach it would likely be insightful to further consider the isoelectric point (pI)  
406 of the mini-spidroins and their constituent domains <sup>37</sup>.

407

#### 408 **4. Conclusions**

409 Biomimetic spinning offers a number of advantages over spinning using denaturing  
410 conditions, which arguably produces aggregates of denatured protein rather than correctly  
411 assembled spider silk. However, in order to be effective, we must understand the impact of  
412 pH, ion exchange and shear stress on biomimetic spinning dopes consisting of “complete”  
413 spidroins featuring both terminal domains. This work examines the production of a range of  
414 such mini-spidroins, and thoroughly investigates the conditions necessary for their  
415 biomimetic spinning. Similarities between the rheology of a mini-spidroin in this study, and  
416 that of native spider silk spinning dopes, suggest the inclusion of terminal domains is crucial  
417 in mimicking the spiders use of shear in the spinning duct to help achieve aligned fibrillar  
418 fibers. The terminal domains also allow polymerisation of a spidroin upon a pH drop.  
419 However, our results suggest that a pH drop alone is insufficient and a combination with  
420 salting-out, for which spiders use the exchange of sodium and chloride ions for potassium  
421 and phosphate ions, is critical for the production of robust fibers in a biomimetic wet

422 spinning process. Using these conditions, biomimetic wet spinning allowed fibers to be spun  
423 continuously from a small mini-spidroin, with fibers formed from many aligned fibrils.  
424 However, fibers with diameters larger than native spider silk, and relatively poor mechanical  
425 properties, suggest an improved biomimetic spinning process is required. Our results  
426 provide the basis for the development of such a biomimetic spinning technique, which  
427 might combine shear with a biomimetic assembly buffer, as characterized here. Such a  
428 technique could offer substantial improvements to the quality of fibers achievable from  
429 small mini-spidroins, which are attractive for production at industrial scale since they can be  
430 produced at high yields. Future investigations into the underlying mechanisms by which  
431 ionic strength and pH drop facilitate fiber formation, could offer further improvements.

#### 432 **Acknowledgments**

433 WF and ADR acknowledge funding from the Defence, Science and Technology Laboratory  
434 (DSTL, UK Ministry of Defence, DSTLX1000101893). This is a contribution from the  
435 Manchester Centre for Synthetic Biology of Fine and Speciality Chemicals (SYNBIOCHEM)  
436 and acknowledges the Biotechnology and Biological Sciences Research Council (BBSRC) and  
437 Engineering and Physical Sciences Research Council (EPSRC) for financial support (Grant No.  
438 William). JJB, ADR, ET, RB and NSS acknowledge funding from DSTL, UK Ministry of Defence,  
439 project no. CDE100640.

#### 440 **Author Contributions**

441 NSS, RB, JJB and ET conceived the initial study design and supervised all aspects of the work.  
442 WF and ADR performed the experimental work. WF and ADR drafted the manuscript. NSS,

443 RB, JJB and ET revised the manuscript. All authors reviewed and approved the final  
444 manuscript.

445 **Additional Information**

446 **Corresponding Author**

447 Eriko Takano. [eriko.takano@manchester.ac.uk](mailto:eriko.takano@manchester.ac.uk).

448 **Conflicts of Interest**

449 The authors declare no conflict of interest.

450

## 451 REFERENCES

- 452 1. Kluge, J. A., Rabotyagova, O., Leisk, G. G. & Kaplan, D. L. Spider silks and their applications.  
453 *Trends Biotechnol.* **26**, 244–251 (2008).
- 454 2. Lewis, R. Unraveling the weave of spider silk. *Bioscience* **46**, 636–638 (1996).
- 455 3. Rising, A. & Johansson, J. Toward spinning artificial spider silk. *Nat. Chem. Biol.* **11**, 309–315  
456 (2015).
- 457 4. Tokareva, O., Jacobsen, M., Buehler, M., Wong, J. & Kaplan, D. L. Structure-function-property-  
458 design interplay in biopolymers: Spider silk. *Acta Biomater.* **10**, 1612–1626 (2014).
- 459 5. Andersson, M. *et al.* Biomimetic spinning of artificial spider silk from a chimeric minispidroin.  
460 *Nat. Chem. Biol.* **13**, 262–264 (2017).
- 461 6. Xia, X.-X. *et al.* Native-sized recombinant spider silk protein produced in metabolically  
462 engineered *Escherichia coli* results in a strong fiber. *Proc. Natl. Acad. Sci. U.S.A.* **107**, 14059–  
463 14063 (2010).
- 464 7. Zhou, Y., Rising, A., Johansson, J. & Meng, Q. Production and properties of triple chimeric  
465 spidroins. *Biomacromolecules* **19**, 2825–2833 (2018).
- 466 8. Holland, C., Terry, A. E., Porter, D. & Vollrath, F. Natural and unnatural silks. *Polymer.* **48**,  
467 3388–3392 (2007).
- 468 9. Heidebrecht, A. *et al.* Biomimetic fibers made of recombinant spidroins with the same  
469 toughness as natural spider silk. *Adv. Mater.* **27**, 2189–2194 (2015).
- 470 10. Vollrath, F. & Knight, D. P. Liquid crystalline spinning of spider silk. *Nature* **410**, 541–548  
471 (2001).
- 472 11. Braun, F. N. & Viney, C. Modelling self assembly of natural silk solutions. *Int. J. Biol.*  
473 *Macromol.* **32**, 59–65 (2003).
- 474 12. Humenik, M., Smith, A. M., Arndt, S. & Scheibel, T. Data for ion and seed dependent fibril  
475 assembly of a spidroin core domain. *Data Br.* **4**, 571–576 (2015).
- 476 13. Eisoltd, L., Hardy, J. G., Heim, M. & Scheibel, T. R. The role of salt and shear on the storage  
477 and assembly of spider silk proteins. *J. Struct. Biol.* **170**, 413–419 (2010).
- 478 14. Knight, D. P. & Vollrath, F. Changes in element composition along the spinning duct in a  
479 *Nephila* spider. *Naturwissenschaften* **88**, 179–182 (2001).
- 480 15. Oktaviani, N. A., Matsugami, A., Hayashi, F. & Numata, K. Ion effects on the conformation and  
481 dynamics of repetitive domains of a spider silk protein: implications for solubility and  $\beta$ -sheet  
482 formation. *Chem. Commun.* **55**, 9761–9764 (2019).
- 483 16. Andersson, M. *et al.* Carbonic anhydrase generates CO<sub>2</sub> and H<sup>+</sup> that drive spider silk  
484 formation via opposite effects on the terminal domains. *PLoS Biol.* **12**, 1–14 (2014).
- 485 17. Dicko, C., Vollrath, F. & Kenney, J. M. Spider silk protein refolding is controlled by changing  
486 pH. *Biomacromolecules* **5**, 704–710 (2004).
- 487 18. Oktaviani, N. A. *et al.* Conformation and dynamics of soluble repetitive domain elucidates the  
488 initial  $\beta$ -sheet formation of spider silk. *Nat. Commun.* **9**, 1–7 (2018).
- 489 19. Gaines, W. A., Sehorn, M. G. & Marcotte, W. R. Spidroin N-terminal domain promotes a ph-  
490 dependent association of silk proteins during self-assembly. *J. Biol. Chem.* **285**, 40745–40753  
491 (2010).

- 492 20. Hagn, F. *et al.* A conserved spider silk domain acts as a molecular switch that controls fibre  
493 assembly. *Nature* **465**, 239–242 (2010).
- 494 21. Gauthier, M., Leclerc, J., Lefèvre, T., Gagné, S. M. & Auger, M. Effect of pH on the structure of  
495 the recombinant C-terminal domain of *Nephila clavipes* dragline silk protein.  
496 *Biomacromolecules* **15**, 4447–4454 (2014).
- 497 22. Gao, Z. *et al.* Structural characterization of minor ampullate spidroin domains and their  
498 distinct roles in fibroin solubility and fiber formation. *PLoS One* **8**, (2013).
- 499 23. Savitsky, P. *et al.* High-throughput production of human proteins for crystallization: The SGC  
500 experience. *J. Struct. Biol.* **172**, 3–13 (2010).
- 501 24. Gibson, D. G. Enzymatic assembly of overlapping DNA fragments. *Methods Enzymol.* **498**,  
502 349–361 (2011).
- 503 25. Gasteiger, E. *et al.* Protein identification and analysis tools on the ExPASy server. *Proteomics*  
504 *Protoc. Handb.* 571–607 (2005). doi:10.1385/1-59259-890-0:571
- 505 26. Huynh, K. & Partch, C. L. Analysis of protein stability and ligand interactions by thermal shift  
506 assay. 1–19 (2016).
- 507 27. Dicko, C., Kasoju, N., Hawkins, N. & Vollrath, F. Differential scanning fluorimetry illuminates  
508 silk feedstock stability and processability. *Soft Matter* **12**, 255–262 (2016).
- 509 28. Vivoli, M., Novak, H. R., Littlechild, J. A. & Harmer, N. J. Determination of protein-ligand  
510 interactions using differential scanning fluorimetry. *J. Vis. Exp.* 1–13 (2014).
- 511 29. Schwarze, S., Zwettler, F. U., Johnson, C. M. & Neuweiler, H. The N-terminal domains of  
512 spider silk proteins assemble ultrafast and protected from charge screening. *Nat. Commun.* **4**,  
513 1–7 (2013).
- 514 30. Hijirida, D. H., Do, K. G., Michal, C. & Jelinski, L. W. 13C NMR of *Nephila clavipes* major  
515 ampullate silk gland. *Biophys. J.* **71**, 3442–3447 (1996).
- 516 31. Holland, C., Terry, A. E., Porter, D. & Vollrath, F. Comparing the rheology of native spider and  
517 silkworm spinning dope. *Nat. Mater.* **5**, 870–874 (2006).
- 518 32. Rammensee, S., Slotta, U., Scheibel, T. & Bausch, A. R. Assembly mechanism of recombinant  
519 spider silk proteins. *Proc. Natl. Acad. Sci.* **105**, 6590–6595 (2008).
- 520 33. Magaz, A. *et al.* Porous, aligned, and biomimetic fibers of regenerated silk fibroin produced  
521 by solution blow spinning. *Biomacromolecules* **19**, 4542–4553 (2018).
- 522 34. Chen, X., Knight, D. P. & Vollrath, F. Rheological characterization of *Nephila* spidroin solution.  
523 *Biomacromolecules* **3**, 644–648 (2002).
- 524 35. Hagn, F., Thamm, C., Scheibel, T. & Kessler, H. pH-dependent dimerization and salt-  
525 dependent stabilization of the N-terminal domain of spider dragline silk - Implications for  
526 fiber formation. *Angew. Chemie - Int. Ed.* **50**, 310–313 (2011).
- 527 36. Kronqvist, N. *et al.* Sequential pH-driven dimerization and stabilization of the N-terminal  
528 domain enables rapid spider silk formation. *Nat. Commun.* **5**, 3254 (2014).
- 529 37. Xu, D., Guo, C. & Holland, G. P. Probing the impact of acidification on spider silk assembly  
530 kinetics. *Biomacromolecules* **16**, 2072–2079 (2015).
- 531 38. Askarieh, G. *et al.* Self-assembly of spider silk proteins is controlled by a pH-sensitive relay.  
532 *Nature* **465**, 236–238 (2010).

- 533 39. Stark, M. *et al.* Macroscopic fibers self-assembled from recombinant miniature spider silk  
534 proteins. *Biomacromolecules* **8**, 1695–1701 (2007).
- 535 40. Sparkes, J. & Holland, C. Analysis of the pressure requirements for silk spinning reveals a  
536 pultrusion dominated process. *Nat. Commun.* **8**, 1–10 (2017).
- 537 41. Koepfel, A. & Holland, C. Progress and trends in artificial silk spinning: A systematic review.  
538 *ACS Biomater. Sci. Eng.* **3**, 226–237 (2017).
- 539 42. Plaza, G. R. *et al.* Relationship between microstructure and mechanical properties in spider  
540 silk fibers: Identification of two regimes in the microstructural changes. *Soft Matter* **8**, 6015–  
541 6026 (2012).
- 542 43. Keten, S., Xu, Z., Ihle, B. & Buehler, M. J. Nanoconfinement controls stiffness, strength and  
543 mechanical toughness of  $\beta$ -sheet crystals in silk. *Nat. Mater.* **9**, 359–367 (2010).
- 544 44. Du, N. *et al.* Design of superior spider silk: From nanostructure to mechanical properties.  
545 *Biophys. J.* **91**, 4528–4535 (2006).
- 546 45. Roberts, A. D. *et al.* Synthetic biology for fibers, adhesives, and active camouflage materials in  
547 protection and aerospace. *MRS Commun.* 1–19 (2019).
- 548
- 549
- 550

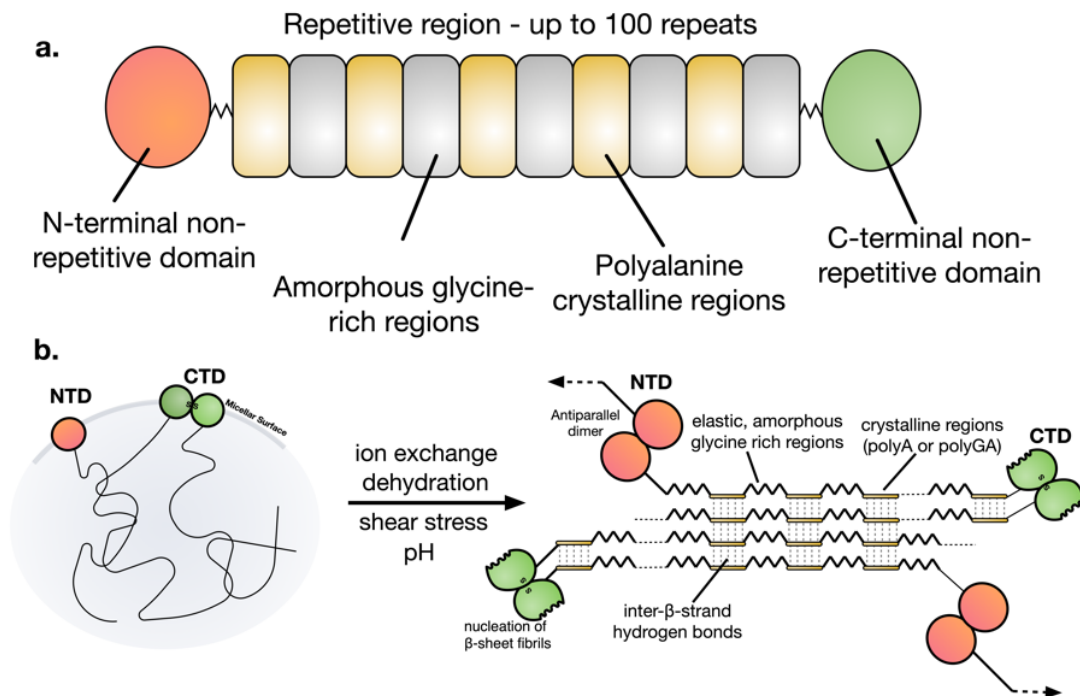

551



552 **Figure 1. Schematic representation of a native spider silk protein A.** The domain structure of spider  
553 silk proteins, consisting of non-repetitive N- and C- terminal domains, flanking a much larger  
554 repetitive section, which alternates between glycine-rich regions and polyalanines. **B.** A model for  
555 the conversion of soluble spidroins, stored as protein micelles, into insoluble silk fibers through the  
556 assembly triggers of shearing force or elongational flow, changing pH, dehydration and changing  
557 salts in the silk gland of a spider. Reproduced from <sup>45</sup>.

558

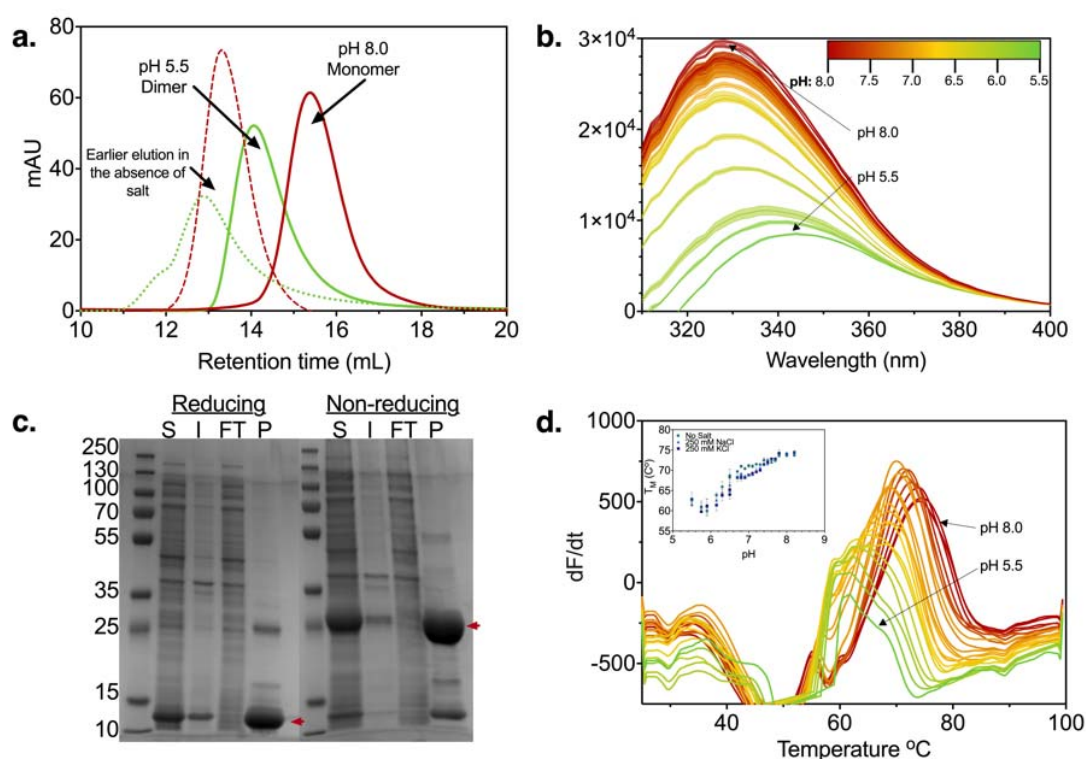

559

560 **Figure 2. Characterisation of N- and C-terminal domains. A.** Size exclusion chromatography of NTD2  
561 at pH 8.0 (red) and pH 5.5 (green), showing peaks corresponding to a monomer and a dimer  
562 respectively. 250  $\mu$ l of purified NTD2 at 3.4 mg/mL loaded onto a Superdex 200 Increase 10/300 GL  
563 size exclusion column pre-equilibrated in the relevant buffer. Peaks coming off the column at

564 different retention times, corresponding to a dimer and a monomer, were detected for buffers at pH  
565 5.5 and pH 8.0, respectively. Runs were performed in 300 mM NaCl in both cases, without which the  
566 elution time was shorter, possibly indicating larger multimers (dashed lines). Following elution,  
567 samples in the absence of salt appeared cloudy, suggesting aggregation. **B.** Tryptophan fluorescence  
568 of NTD2. **C.** Reducing and non-reducing SDS-PAGE gels showing the purification of CTD1 by nickel  
569 immobilized metal affinity chromatography. S: Soluble, I: Insoluble, FT: Flow-through, P: Purified. A  
570 band corresponding to a CTD1 monomer is observed under reducing conditions, while a band  
571 corresponding to a CTD1 dimer is observed under non-reducing conditions (red arrows). **D.**  
572 Differential scanning fluorimetry of CTD1 at various pH values pH 8.2 (red) to pH 5.5 (green), as  
573 shown in legend for B), with 250 mM NaCl. The plot shows the derivative of the fluorescence signal,  
574 with the peak corresponding to the denaturing temperature (TM) of the protein. (The assay was also  
575 performed with 250 mM KCl and without salt, giving similar results.)

576

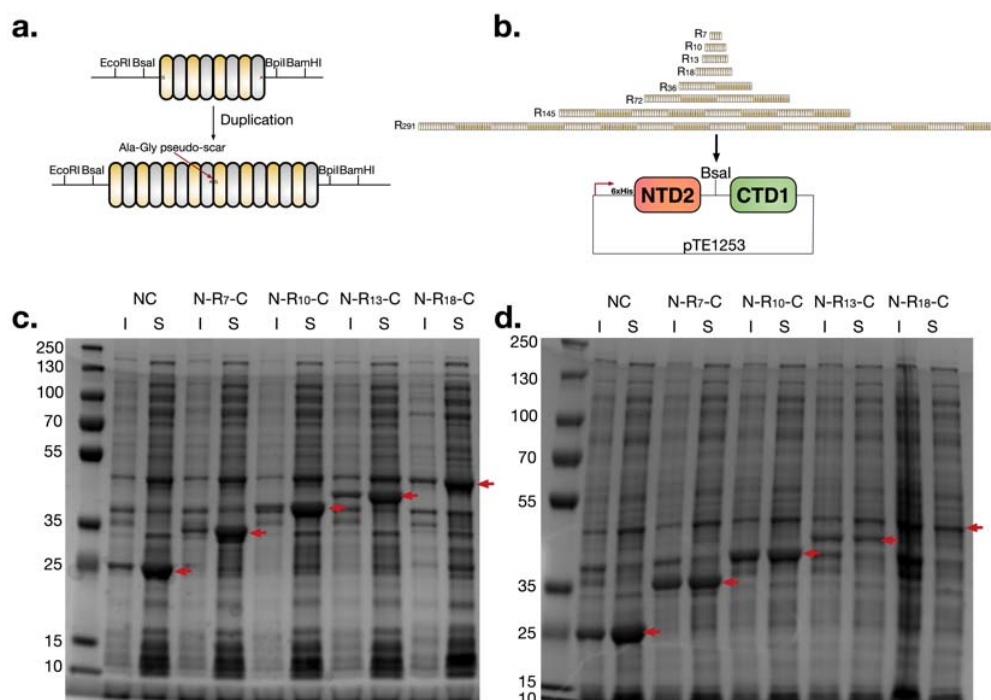

577

578 **Figure 3. Heterologous expression of spidroins.** Cloning scheme for (A) the duplication of repetitive  
579 regions, and (B) their incorporation into the pTE1253 vector for expression of complete mini-  
580 spidroins with both terminal domains. Both the duplication of repetitive regions, and their transfer  
581 into pTE1253 utilise type IIS restriction enzymes Bsal and Bpil resulting in an innocuous scar  
582 sequence which codes for alanine-glycine (Supplementary Material **Figure S4**). **C** and **D**. SDS-PAGE  
583 of soluble (S) and insoluble (I) fractions of *E. coli* lysate following expression of various mini-spidroins  
584 for four hours (C) or 20 hours (D) at 20 °C. Overexpressed proteins at the expected molecular weight  
585 are indicated by red arrows.

586

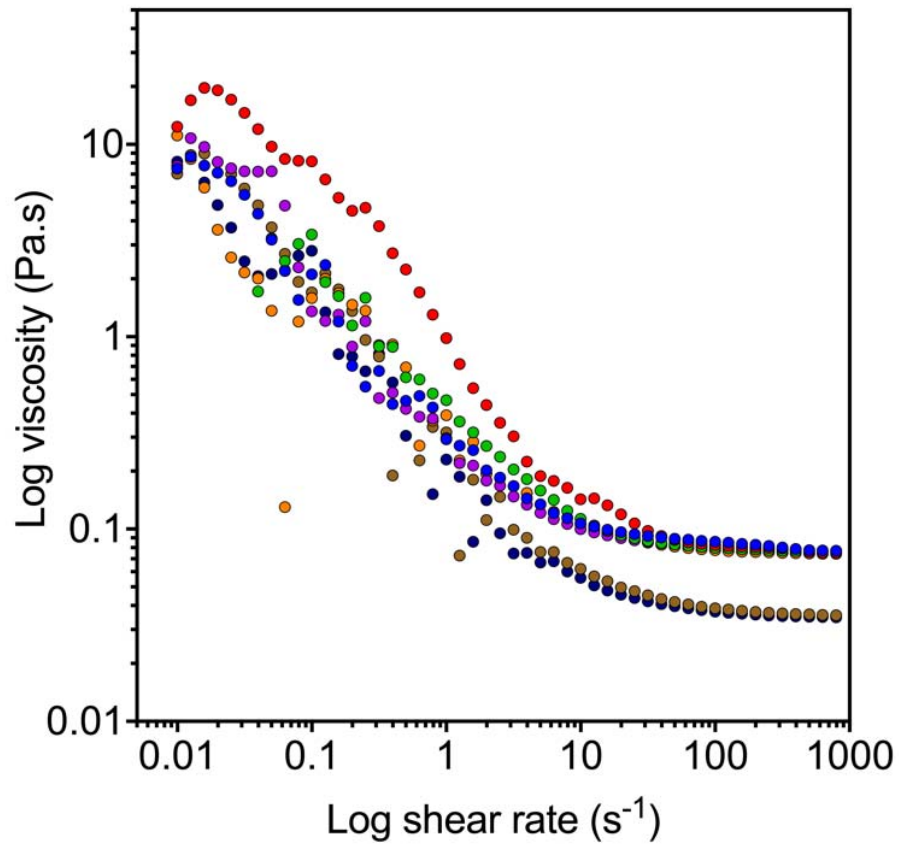

587

588 **Figure 4.** Multiple flow sweeps of 200 mg/mL (20 % w/v) N-R<sub>7</sub>-C. Each sample displayed shear  
589 thinning to near identical viscosity following repeated runs. Four repeated runs were carried out for  
590 two samples. Shear history did not appear to have an effect on the rheology of the sample.

591

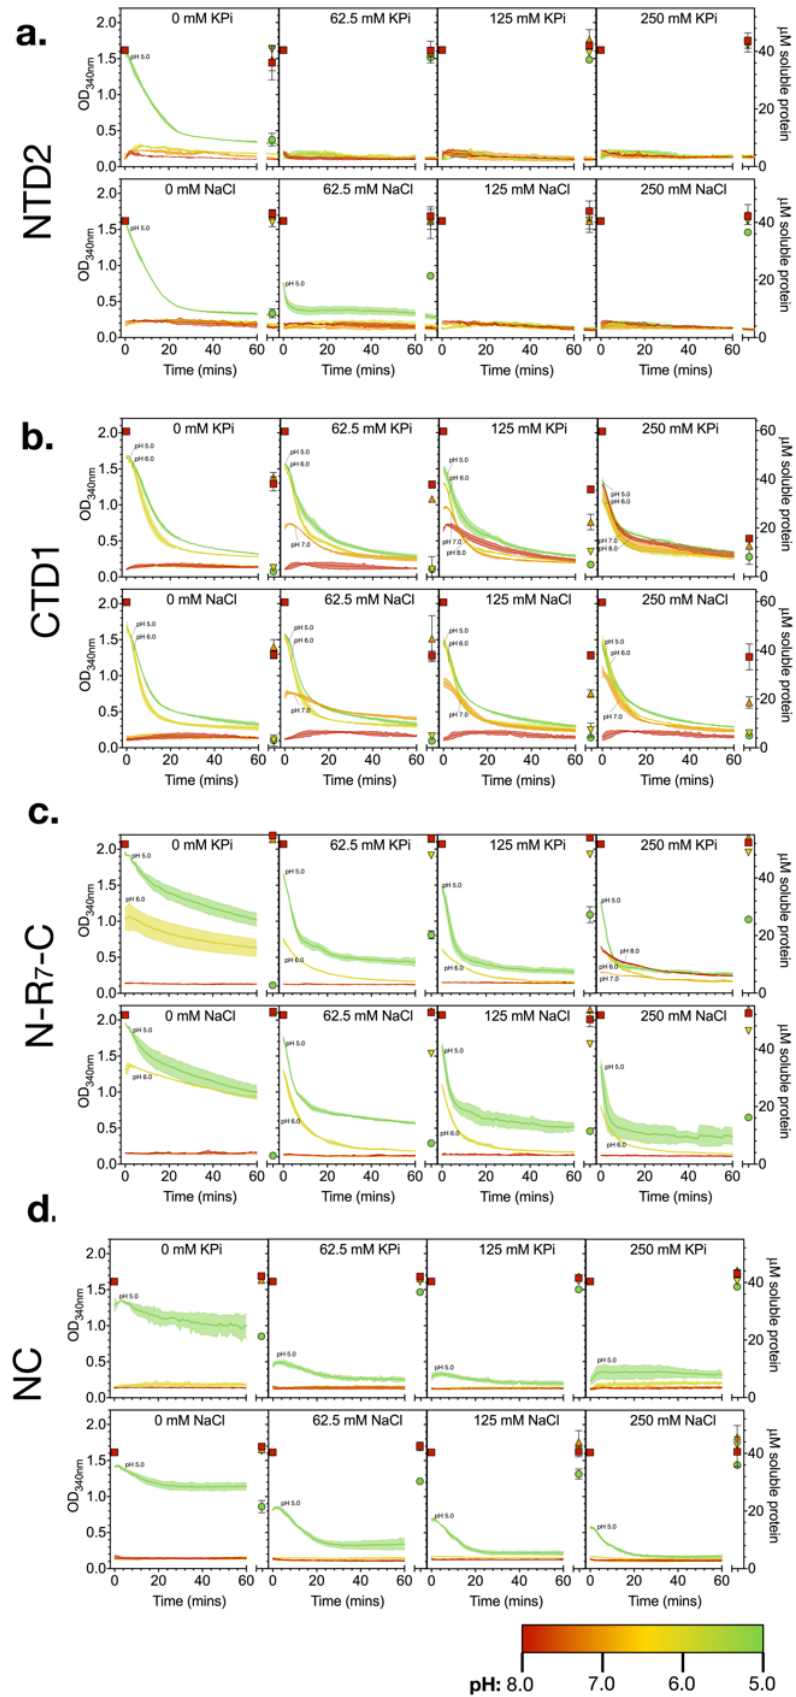

593 **Figure 5. NTD2 (A), CTD1 (B), N-R<sub>7</sub>-C (C), and NC (D) characterization** The effect of pH and salt.  
594 Turbidity as measured by OD<sub>340nm</sub> (left axis) over time at various pH values and salt concentrations.  
595 pH is indicated by colour: pH 5 (green), pH 6 (yellow), pH 7 (orange), pH 8 (red), as also indicated in  
596 the legend. The right axis shows protein concentration, as determined by nanodrop at OD<sub>280nm</sub>  
597 before and after the assay, shown by pH 8: squares, pH 7: upwards triangles, pH 6: downwards  
598 triangles and pH 5: circles. Error bars show the standard deviation of three replicates in both cases.

599

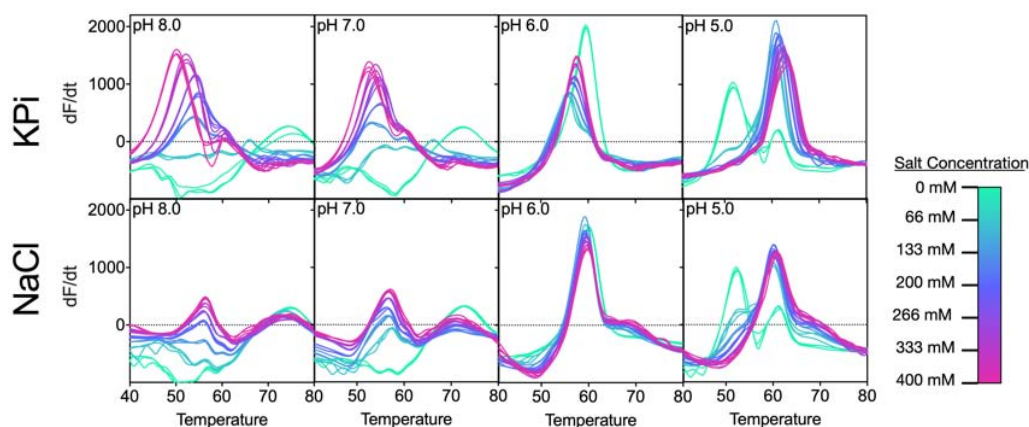

600

601 **Figure 6.** Differential scanning fluorimetry of N-R<sub>7</sub>-C at different pH values and NaCl or KPi  
602 concentrations. NaCl or KPi concentrations are indicated according to the colour chart. A large shift  
603 in the TM is observed at pH 5.0 in the absence of either NaCl or KPi, as indicated by the red arrow.  
604 Temperature is shown in °C. Negative signals in the DSF assay indicate a decreasing fluorescence  
605 signal (as dF/dT is plotted). This may be due exposed hydrophobic regions on the protein (either due  
606 to the native conformation of the protein or due to a fraction of the sample being denatured at the  
607 start of the assay) to which sypro orange can immediately bind, gradually releasing the dye as  
608 temperature increases, resulting in a loss of fluorescence signal.

609

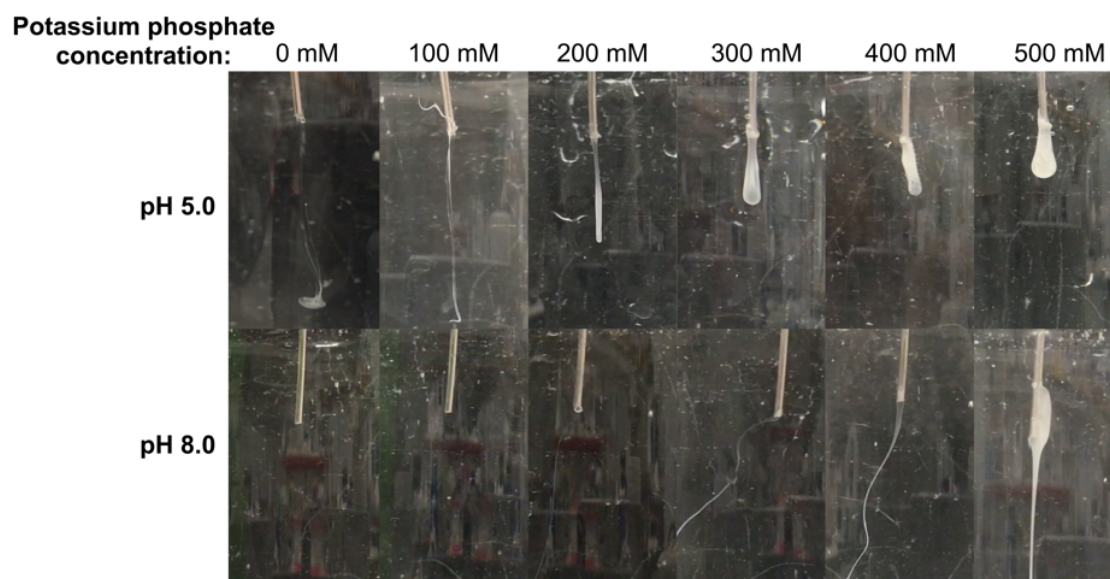

610

611 **Figure 7. Wet spinning of N-R<sub>7</sub>-C** Different ranges of potassium phosphate concentrations were used  
612 at pH 5 and pH 8. 100 mg/mL (10 % w/v) to extrude N-R<sub>7</sub>-C at 25  $\mu$ L/min through a blunted 16G  
613 needle. 50 mM sodium acetate or TrisHCl was used to at pH 5 and pH 8 respectively. Potassium  
614 phosphate was prepared at the relevant pH by mixing solutions of KH<sub>2</sub>PO<sub>4</sub> and K<sub>2</sub>HPO<sub>4</sub> in each case.

615

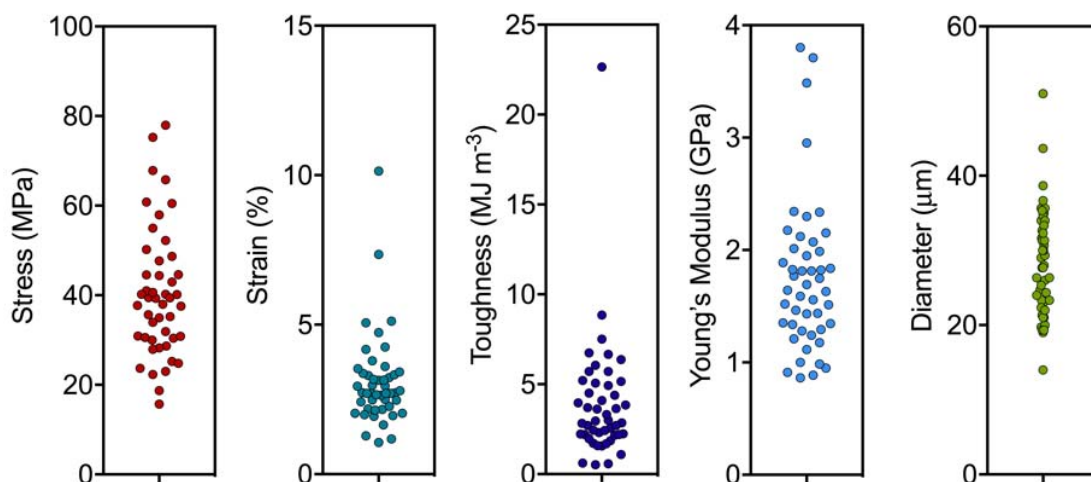

616

617 **Figure 8. Mechanical testing of synthetic spider silk fibers from N-R<sub>7</sub>-C.** Mechanical properties were  
618 calculated from stress strain curves (Figure S9).

619

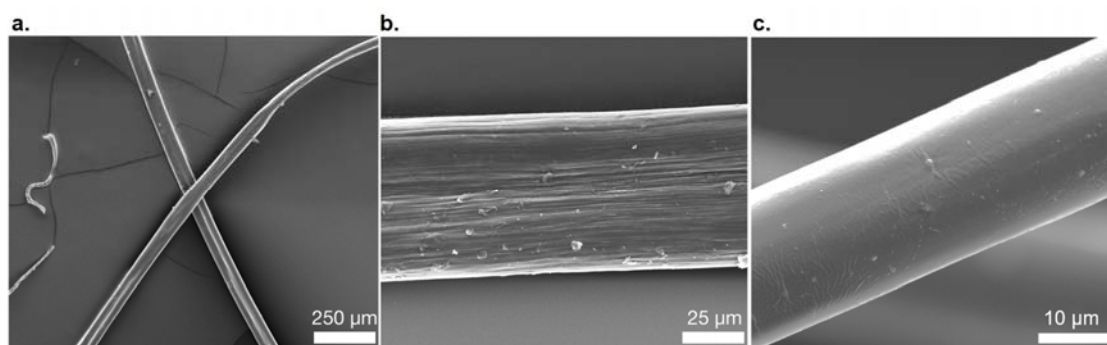

620

621 **Figure 9.** SEM images of spun fibers of N-R<sub>7</sub>-C. Scale bars show 250 μm (A), 25 μm (B) 10 μm (C).  
622 Aligned fibrils are observed at high magnification in some cases (B), but not others (C). The fiber  
623 shown in panel C represents a second batch of fibers, spun on a separate occasion to the fibers  
624 shown in A and B.

625
